# Supplementary material
Source: HighWire-hosted journal article supplement (http://spcare.bmj.com/highwire/filestream/155686/field_highwire_adjunct_files/0/spcare-2023-004163supp001_data_supplement.pdf)
Supplement: spcare-2023-004163supp001_data_supplement.pdf [file spcare-2023-004163supp001_data_supplement.pdf]

## Supplemental Material A

### Search strategy

| Database  | Search strategy                                                                                                                                                                                                                                                                                  | Records retrieved |
|-----------|--------------------------------------------------------------------------------------------------------------------------------------------------------------------------------------------------------------------------------------------------------------------------------------------------|-------------------|
| CINAHL    | AB "serious illness communication" OR AB "serious illness program*" OR AB "serious illness care" OR AB "serious illness conversation*" OR AB "serious illness model"<br>Limited to English, publications from 2014-01, academic journals.                                                        | 148               |
| MEDLINE   | AB "serious illness communication" OR AB "serious illness program*" OR AB "serious illness care" OR AB "serious illness conversation*" OR AB "serious illness model"<br>Limited to English, publications from 2014-01, academic journals.                                                        | 211               |
| PsychInfo | AB "serious illness communication" OR "AB serious illness program*" OR AB "serious illness care" OR AB "serious illness conversation*" OR AB "serious illness model"<br>Limited to English, publications from 2014, academic journals.                                                           | 60                |
| PubMed    | ("serious illness communication"[Title/Abstract]) OR (((serious illness program*[Title/Abstract]) OR (serious illness care[Title/Abstract])) OR (serious illness conversation*[Title/Abstract])) OR (serious illness model[Title/Abstract])<br>Limited to English, publications from 2014-01-01. | 279               |

## Supplementary Material B

## JBI Quality Appraisal Checklists

| Checklist for Randomized Controlled Trials |    |    |    |    |    |    |    |     |    |     |     |     |     |
|--------------------------------------------|----|----|----|----|----|----|----|-----|----|-----|-----|-----|-----|
| Articles                                   | Q1 | Q2 | Q3 | Q4 | Q5 | Q6 | Q7 | Q8  | Q9 | Q10 | Q11 | Q12 | Q13 |
| O'Donnell et al. <sup>31</sup>             | Y  | Y  | U  | N  | N  | Y  | Y  | Y   | Y  | Y   | U   | U   | Y   |
| Manz et al. <sup>25</sup>                  | Y  | N  | Y  | Y  | N  | Y  | Y  | N/A | Y  | Y   | Y   | Y   | Y   |
| Paladino et al. <sup>17</sup>              | Y  | Y  | Y  | Y  | N  | Y  | Y  | Y   | Y  | Y   | U   | U   | Y   |
| Paladino et al. <sup>4</sup>               | Y  | Y  | Y  | Y  | N  | Y  | Y  | Y   | Y  | Y   | Y   | U   | Y   |
| Li et al. <sup>26</sup>                    | Y  | Y  | Y  | Y  | U  | Y  | Y  | N/A | Y  | Y   | Y   | U   | Y   |

Y = Yes; N= No; U = Unsure; N/A = Not applicable.

Tufanaru C, Munn Z, Aromataris E, Campbell J, Hopp L. Chapter 3: Systematic reviews of effectiveness. In: Aromataris E, Munn Z (Editors). *JBI Manual for Evidence Synthesis*. JBI, 2020. Available from <https://synthesismanual.jbi.global>

| Checklist for Quasi-Experimental Studies |    |    |    |    |    |     |    |    |    |
|------------------------------------------|----|----|----|----|----|-----|----|----|----|
| Articles                                 | Q1 | Q2 | Q3 | Q4 | Q5 | Q6  | Q7 | Q8 | Q9 |
| Lakin et al. <sup>55</sup>               | Y  | N  | Y  | Y  | N  | Y   | Y  | Y  | Y  |
| Karim et al. <sup>53</sup>               | Y  | U  | U  | N  | N  | N/A | Y  | Y  | Y  |
| Wasp et al. <sup>*47</sup>               | U  | Y  | U  | N  | N  | N/A | Y  | U  | U  |
| Ma et al. <sup>40</sup>                  | Y  | Y  | Y  | N  | N  | N/A | Y  | Y  | U  |
| Paladino et al. <sup>*42</sup>           | N  | Y  | N  | N  | N  | N/A | Y  | U  | Y  |
| Massman et al. <sup>33</sup>             | U  | Y  | U  | N  | N  | N/A | Y  | U  | U  |
| Tam et al. <sup>*35</sup>                | Y  | Y  | Y  | N  | N  | N/A | Y  | U  | Y  |
| Lally et al. <sup>39</sup>               | N  | U  | Y  | N  | N  | N/A | Y  | U  | U  |
| Lakin et al. <sup>19</sup>               | U  | Y  | U  | Y  | N  | N/A | Y  | Y  | U  |
| Zehm et al. <sup>*72</sup>               | U  | Y  | U  | N  | N  | N/A | Y  | U  | U  |
| Hafid et al. <sup>*52</sup>              | U  | Y  | Y  | N  | N  | N/A | Y  | U  | U  |
| Sanders et al. <sup>*69</sup>            | U  | Y  | U  | N  | N  | N/a | Y  | U  | U  |
| Wasp et al. <sup>70</sup>                | N  | U  | U  | N  | N  | N/A | Y  | U  | U  |

Y = Yes; N= No; U = Unclear; N/A = Not applicable; \* = mixed method/multiple checklists.

Tufanaru C, Munn Z, Aromataris E, Campbell J, Hopp L. Chapter 3: Systematic reviews of effectiveness. In: Aromataris E, Munn Z (Editors). *JBI Manual for Evidence Synthesis*. JBI, 2020. Available from <https://synthesismanual.jbi.global>

| Checklist for Cohort Studies   |    |    |    |    |    |    |    |    |    |     |     |
|--------------------------------|----|----|----|----|----|----|----|----|----|-----|-----|
| Articles                       | Q1 | Q2 | Q3 | Q4 | Q5 | Q6 | Q7 | Q8 | Q9 | Q10 | Q11 |
| Le et al. <sup>56</sup>        | Y  | Y  | Y  | Y  | U  | U  | Y  | Y  | U  | Y   | Y   |
| Greenwald et al. <sup>22</sup> | Y  | Y  | U  | Y  | U  | U  | U  | Y  | Y  | Y   | Y   |
| Gace et al. <sup>21</sup>      | U  | U  | U  | Y  | U  | U  | Y  | U  | N  | N   | Y   |

Y = Yes; N= No; U = Unclear; N/A = Not applicable.

Moola S, Munn Z, Tufanaru C, Aromataris E, Sears K, Sfetcu R, Currie M, Qureshi R, Mattis P, Lisy K, Mu P-F. Chapter 7: Systematic reviews of etiology and risk. In: Aromataris E, Munn Z (Editors). *JBI Manual for Evidence Synthesis*. JBI, 2020. Available from <https://synthesismanual.jbi.global>

| Checklist for Analytical Cross Sectional Studies |    |    |    |    |    |    |    |    |
|--------------------------------------------------|----|----|----|----|----|----|----|----|
| Articles                                         | Q1 | Q2 | Q3 | Q4 | Q5 | Q6 | Q7 | Q8 |
| Thamcharoen et al. <sup>*61</sup>                | Y  | Y  | Y  | Y  | U  | U  | U  | Y  |
| Greenwald et al. <sup>51</sup>                   | Y  | Y  | U  | U  | N  | N  | U  | Y  |
| Kumar et al. <sup>*8</sup>                       | Y  | Y  | Y  | Y  | Y  | N  | U  | Y  |
| Geerse et al. <sup>*15</sup>                     | Y  | Y  | U  | U  | Y  | U  | U  | Y  |
| Paladino et al. <sup>*16</sup>                   | Y  | Y  | U  | U  | Y  | N  | U  | Y  |
| Miranda et al. <sup>*14</sup>                    | Y  | Y  | U  | Y  | Y  | N  | U  | Y  |
| Lamas et al. <sup>29</sup>                       | Y  | Y  | Y  | Y  | N  | N  | U  | Y  |
| Daubman et al. <sup>23</sup>                     | Y  | Y  | U  | U  | N  | N  | U  | U  |

|                                |   |   |   |   |   |   |   |   |
|--------------------------------|---|---|---|---|---|---|---|---|
| Ko et al. <sup>38</sup>        | N | N | Y | U | Y | Y | U | Y |
| Pasricha et al. <sup>*43</sup> | Y | Y | U | Y | Y | N | U | Y |
| Daly et al. <sup>27</sup>      | Y | Y | U | U | Y | U | U | Y |
| Jacobsen et al. <sup>24</sup>  | N | Y | U | U | U | N | U | Y |
| Reed-Guy et al. <sup>*59</sup> | Y | Y | U | Y | Y | N | U | Y |
| Moye et al. <sup>*57</sup>     | Y | Y | U | Y | Y | Y | U | Y |
| Pottash et al. <sup>*44</sup>  | Y | U | U | Y | N | N | U | Y |
| Bowman et al. <sup>63</sup>    | Y | Y | U | U | Y | N | U | Y |
| Daly et al. <sup>28</sup>      | Y | Y | U | U | N | N | U | Y |
| Davoudi et al. <sup>64</sup>   | Y | Y | U | U | Y | U | U | Y |
| Hu et al. <sup>66</sup>        | Y | Y | U | U | U | N | U | Y |
| King et al. <sup>67</sup>      | Y | Y | Y | Y | Y | Y | U | Y |

Y = Yes; N= No; U = Unclear; N/A = Not applicable; \* = mixed method/multiple checklists.

Moola S, Munn Z, Tufanaru C, Aromataris E, Sears K, Sfetcu R, Currie M, Qureshi R, Mattis P, Lisy K, Mu P-F. Chapter 7: Systematic reviews of etiology and risk. In: Aromataris E, Munn Z (Editors). JBI Manual for Evidence Synthesis. JBI, 2020. Available from <https://synthesismanual.jbi.global>

| Checklist for Qualitative Research      |    |    |    |    |    |    |    |    |    |     |
|-----------------------------------------|----|----|----|----|----|----|----|----|----|-----|
| Articles                                | Q1 | Q2 | Q3 | Q4 | Q5 | Q6 | Q7 | Q8 | Q9 | Q10 |
| Thamcharoen et al. <sup>*61</sup>       | Y  | Y  | Y  | Y  | Y  | Y  | U  | Y  | Y  | Y   |
| Paladino et al. <sup>58</sup>           | Y  | Y  | U  | U  | U  | Y  | N  | U  | N  | U   |
| DeCoursey et al. <sup>50</sup>          | Y  | Y  | Y  | Y  | Y  | Y  | Y  | Y  | N  | Y   |
| Paladino et al. <sup>18</sup>           | Y  | Y  | Y  | Y  | Y  | Y  | U  | Y  | Y  | Y   |
| Kumar et al. <sup>*8</sup>              | Y  | Y  | Y  | Y  | Y  | N  | U  | Y  | Y  | Y   |
| Geerse et al. <sup>*15</sup>            | U  | Y  | Y  | U  | U  | N  | U  | U  | Y  | Y   |
| Wasp et al. <sup>*47</sup>              | U  | U  | Y  | Y  | Y  | N  | N  | Y  | Y  | U   |
| Paladino et al. <sup>*16</sup>          | Y  | Y  | Y  | Y  | Y  | N  | U  | Y  | Y  | Y   |
| Paladino et al. <sup>*42</sup>          | Y  | Y  | Y  | Y  | Y  | N  | U  | Y  | Y  | Y   |
| Tam et al. <sup>*35</sup>               | U  | U  | Y  | U  | Y  | N  | N  | Y  | Y  | Y   |
| McGlinchey et al. <sup>34</sup>         | Y  | Y  | Y  | Y  | Y  | N  | N  | Y  | Y  | Y   |
| Geerse et al. <sup>5</sup>              | Y  | Y  | Y  | Y  | Y  | Y  | Y  | Y  | Y  | Y   |
| Lakin et al. <sup>20</sup>              | Y  | Y  | Y  | Y  | Y  | Y  | Y  | Y  | Y  | Y   |
| Miranda et al. <sup>*14</sup>           | U  | U  | U  | U  | U  | N  | N  | Y  | Y  | U   |
| Pasricha et al. <sup>*43</sup>          | U  | Y  | U  | U  | U  | N  | U  | Y  | Y  | Y   |
| Zehm et al. <sup>*72</sup>              | U  | U  | Y  | U  | U  | N  | N  | U  | N  | Y   |
| Borregaard Myrholm et al. <sup>62</sup> | Y  | Y  | Y  | Y  | Y  | Y  | Y  | Y  | N  | Y   |
| Reed-Guy et al. <sup>*59</sup>          | Y  | Y  | Y  | U  | Y  | N  | N  | Y  | Y  | Y   |
| Lagrotteria et al. <sup>54</sup>        | Y  | Y  | Y  | Y  | Y  | Y  | Y  | Y  | Y  | Y   |
| Hafid et al. <sup>*52</sup>             | Y  | Y  | Y  | U  | U  | Y  | N  | U  | Y  | Y   |
| Swiderski et al. <sup>60</sup>          | Y  | Y  | Y  | Y  | Y  | Y  | Y  | Y  | N  | Y   |
| Aaronson et al. <sup>48</sup>           | Y  | Y  | Y  | Y  | Y  | N  | N  | N  | Y  | Y   |
| Moye et al. <sup>*57</sup>              | Y  | Y  | Y  | Y  | Y  | Y  | Y  | Y  | Y  | Y   |
| Pottash et al. <sup>*44</sup>           | U  | Y  | Y  | U  | U  | N  | N  | U  | Y  | Y   |
| LoCastro et al. <sup>68</sup>           | U  | Y  | Y  | Y  | Y  | N  | U  | Y  | Y  | Y   |
| Sanders et al. <sup>*69</sup>           | U  | Y  | Y  | Y  | Y  | U  | U  | Y  | Y  | Y   |
| Xu et al. <sup>71</sup>                 | U  | Y  | Y  | Y  | Y  | N  | U  | Y  | Y  | Y   |
| García et al. <sup>73</sup>             | Y  | Y  | Y  | Y  | Y  | Y  | U  | Y  | Y  | Y   |

Y = Yes; N= No; U = Unclear; N/A = Not applicable; \* = mixed method/multiple checklists.

Lockwood C, Munn Z, Porritt K. Qualitative research synthesis: methodological guidance for systematic reviewers utilizing meta-aggregation. *Int J Evid Based Healthc.* 2015;13(3):179–187.

| Checklist for Case Reports       |    |    |    |    |    |    |    |    |
|----------------------------------|----|----|----|----|----|----|----|----|
| Articles                         | Q1 | Q2 | Q3 | Q4 | Q5 | Q6 | Q7 | Q8 |
| Van Breemen et al. <sup>46</sup> | Y  | Y  | Y  | Y  | Y  | Y  | Y  | Y  |

Y = Yes; N= No; U = Unclear; N/A = Not applicable.

Moola S, Munn Z, Tufanaru C, Aromataris E, Sears K, Sfetcu R, Currie M, Qureshi R, Mattis P, Lisy K, Mu P-F. Chapter 7: Systematic reviews of etiology and risk. In: Aromataris E, Munn Z (Editors). JBI Manual for Evidence Synthesis. JBI, 2020. Available from <https://synthesismanual.jbi.global>

| Checklist for Text and Opinion     |    |    |    |    |    |    |
|------------------------------------|----|----|----|----|----|----|
| Articles                           | Q1 | Q2 | Q3 | Q4 | Q5 | Q6 |
| Beddard-Huber et al. <sup>49</sup> | Y  | Y  | Y  | Y  | Y  | Y  |
| Gelfand et al. <sup>36</sup>       | Y  | Y  | Y  | Y  | Y  | Y  |
| Sirianni et al. <sup>45</sup>      | Y  | Y  | Y  | Y  | Y  | Y  |
| Jain et al. <sup>37</sup>          | Y  | Y  | Y  | Y  | Y  | Y  |
| Baran et al. <sup>32</sup>         | Y  | Y  | Y  | Y  | Y  | Y  |
| Mandel et al. <sup>30</sup>        | Y  | Y  | Y  | Y  | Y  | Y  |
| Bernacki et al. <sup>7</sup>       | Y  | Y  | Y  | Y  | Y  | Y  |
| Ouchi et al. <sup>41</sup>         | Y  | Y  | Y  | Y  | Y  | Y  |
| Karim et al. <sup>65</sup>         | Y  | Y  | Y  | Y  | Y  | Y  |

Y = Yes; N= No; U = Unsure; N/A = Not applicable.

McArthur A, Klugarova J, Yan H, Florescu S. Innovations in the systematic review of text and opinion. *Int J Evid Based Healthc*. 2015;13(3):188–195.
